# Supplementary material for: Cognitive Avoidance Is Associated with Decreased Brain Responsiveness to Threat Distractors under High Perceptual Load
Source: MDPI journal article supplement (doi:10.3390/brainsci13040618), 2023-04-05
Supplement: s1 [file s1]

**Table S1: Correlations between coping styles, trait anxiety, and emotional accuracy effects (hit rate neutral minus hit rate emotion) under low and high perceptual load**

|            | Accuracy effect low load |      | Accuracy effect high load |      |
|------------|--------------------------|------|---------------------------|------|
|            | contempt                 | fear | contempt                  | fear |
| MCI-VIG    | -.08                     | -.04 | .02                       | .03  |
| MCI-CAV    | .10                      | .24  | -.18                      | .13  |
| STAI-trait | -.18                     | -.10 | .09                       | -.04 |

\*p < .05

**Table S2: Perceptual load main effects: Brain regions showing different activation under the high load (vs. low load) condition**

|                                                                                                                                  | Hemisphere | Peak <i>T</i> -value | Peak-level<br><i>p</i> <sub>uncorrected</sub> | Cluster<br>size (voxels) | Cluster-level<br><i>p</i> <sub>FWE</sub> | Peak MNI |          |          |
|----------------------------------------------------------------------------------------------------------------------------------|------------|----------------------|-----------------------------------------------|--------------------------|------------------------------------------|----------|----------|----------|
|                                                                                                                                  |            |                      |                                               |                          |                                          | <i>x</i> | <i>y</i> | <i>z</i> |
| Low perceptual load > high perceptual load                                                                                       |            |                      |                                               |                          |                                          |          |          |          |
| All emotional conditions (contempt, fear, neutral)                                                                               |            |                      |                                               |                          |                                          |          |          |          |
| None                                                                                                                             | -          | -                    | -                                             | -                        | -                                        | -        | -        | -        |
| Low perceptual load < high perceptual load                                                                                       |            |                      |                                               |                          |                                          |          |          |          |
| Contempt                                                                                                                         |            |                      |                                               |                          |                                          |          |          |          |
| Inferior occipital extending to calcarine                                                                                        | L          | 7.31                 | <.001                                         | 740                      | <.001                                    | -21      | -88      | -8       |
| Precentral gyrus (BA6)                                                                                                           | L          | 4.52                 | <.001                                         | 111                      | .04                                      | -30      | -13      | 49       |
| Superior parietal gyrus                                                                                                          | L          | 4.51                 | <.001                                         | 106                      | .04                                      | -21      | -58      | 49       |
| Fear                                                                                                                             |            |                      |                                               |                          |                                          |          |          |          |
| Superior and inferior parietal gyrus, extending to the following regions:                                                        | L/R        | 8.90                 | <.001                                         | 9243                     | <.001                                    | -27      | -52      | 49       |
| bilateral precuneus and cuneus, superior and middle occipital                                                                    | L/R        | 8.00                 | <.001                                         |                          |                                          | -24      | -64      | 37       |
| Cerebellum                                                                                                                       | L/R        | 7.18                 | <.001                                         |                          |                                          | 9        | -67      | -20      |
| Bilateral middle frontal gyrus, extending to bilateral precentral gyrus (BA6), right medial frontal and anterior cingulate gyrus | L/R        | 7.09                 | <.001                                         |                          |                                          | -30      | -7       | 52       |
| Bilateral insula                                                                                                                 | L/R        | 4.58                 | <.001                                         |                          |                                          | 39       | 20       | 7        |
| Bilateral thalamus                                                                                                               | L/R        | 5.27                 | <.001                                         |                          |                                          | 15       | -7       | 4        |

| <i>(table continued)</i>                                                                   |   | Hemisphere | Peak <i>T</i> -value | Peak-level<br><i>p</i> <sub>uncorrected</sub> | Cluster<br>size (voxels) | Cluster-level<br><i>p</i> <sub>FWE</sub> | Peak MNI |          |          |
|--------------------------------------------------------------------------------------------|---|------------|----------------------|-----------------------------------------------|--------------------------|------------------------------------------|----------|----------|----------|
|                                                                                            |   |            |                      |                                               |                          |                                          | <i>x</i> | <i>y</i> | <i>z</i> |
| Low perceptual load < high perceptual load ( <i>continued</i> )                            |   |            |                      |                                               |                          |                                          |          |          |          |
| Neutral                                                                                    |   |            |                      |                                               |                          |                                          |          |          |          |
| Middle occipital gyrus, extending to inferior and superior parietal gyrus (BA7), precuneus | L | 5.81       | <.001                | 749                                           | <.001                    | -30                                      | -79      | 16       |          |
| Occipital gyrus, extending to cuneus, calcarine                                            | R | 5.75       | <.001                | 208                                           | <.01                     | 21                                       | -85      | 1        |          |
| Superior parietal gyrus                                                                    | R | 5.00       | <.001                | 178                                           | <.02                     | 27                                       | -64      | 58       |          |

Neuroanatomical labels, hemisphere, peak voxel *t*- and *p*-values, cluster extent, cluster-level FWE-corrected *p*-values, and coordinates in MNI space are presented. Activation clusters are yielded by one-sample *t*-tests and are significant at  $p = .001$  (uncorrected) and a cluster-level threshold of  $p_{FWE} < .05$ .
